# Supplementary material for: A mitotic chromatin phase transition prevents perforation by microtubules
Source: PubMed Central journal article supplement (PMC9433320; doi:10.1038/s41586-022-05027-y), 2022-08-03
Supplement: 41586_2022_5027_MOESM1_ESM.pdf [file 41586_2022_5027_MOESM1_ESM.pdf]

**Supplementary information**

---

**A mitotic chromatin phase transition prevents perforation by microtubules**

---

In the format provided by the authors and unedited

**a**

Extended Data Fig. 1c

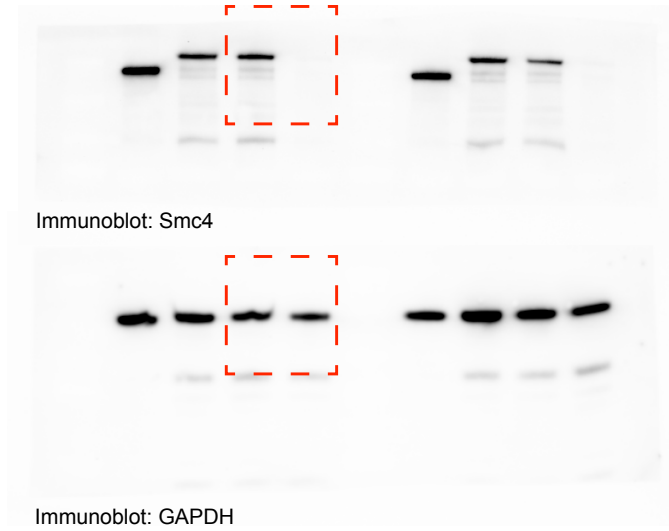

**b**

Extended Data Fig. 10e

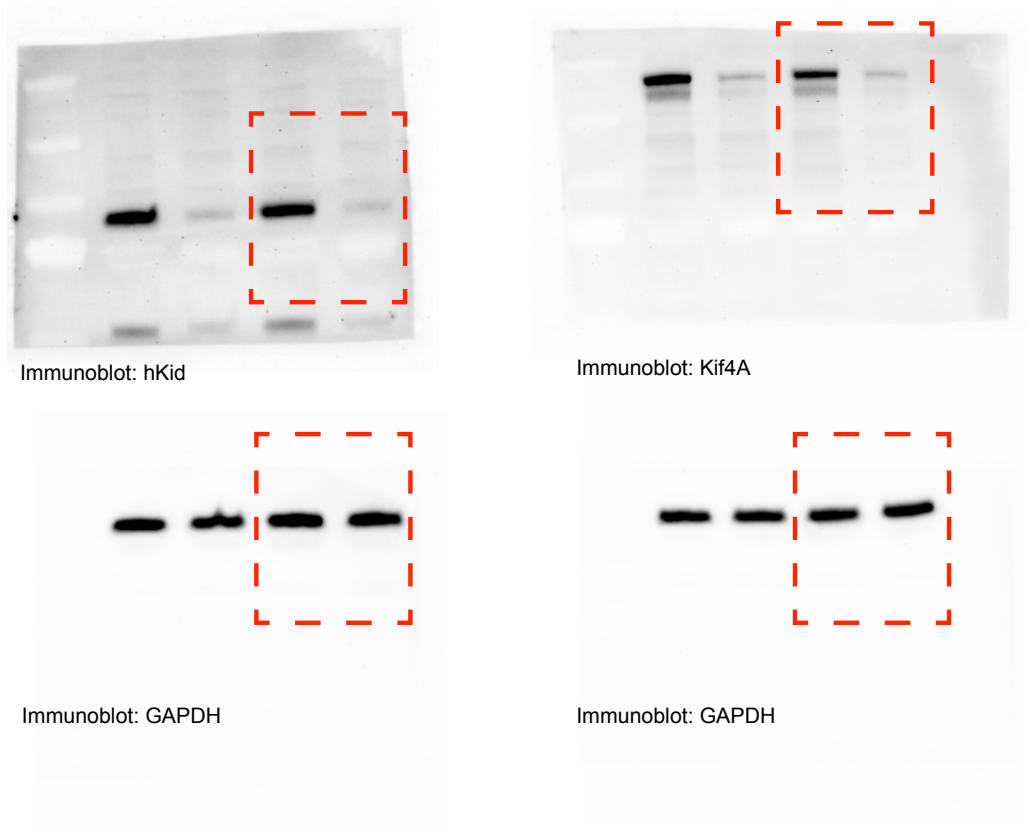

**Supplementary Figure 1** | Source gel data. The full gels correspond to the data shown in **a**, Extended Data Fig. 1c or **b**, Extended Data Fig. 10e. Red boxes indicate image regions displayed in the respective figures.
